# Supplementary material for: Early evolutionary history and genomic features of gene duplicates in the human genome
Source: PubMed Central journal article supplement (PMC4546093; doi:10.1186/s12864-015-1827-3), 2015-08-20
Supplement: 12864_2015_1827_MOESM1_ESM.pdf [file 12864_2015_1827_MOESM1_ESM.pdf]

**Supplementary Table S1. Evolutionary and genomic features of 184 gene duplicates with low synonymous divergence in the human genome.**

Accession numbers in columns 1 and 2 correspond to Ensembl ID version 72 released in June 2013. Column 3 presents the synonymous sequence divergence ( $K_S$ ) between the two paralogs as computed by maximum likelihood. Column 4 presents the nonsynonymous sequence divergence ( $K_A$ ) between the two paralogs as computed by maximum likelihood. Column 5 presents the  $K_A/K_S$  ratio. Chromosomal location of the two paralogs, physical distance and strand orientation if present on the same chromosome are presented in columns 6, 7, and 8, respectively. Column 9 lists the particular category of structural resemblance between the two paralogs. Structural resemblance between paralogs within a duplicate pair was classified as (i) *complete* if sequence homology between the focal paralogs extended throughout their open reading frames (ORFs) from the start to the stop codon and possibly extending into one or both flanking regions, (ii) *partial* if one paralog possessed unique exon(s) in its ORF that are absent in the other paralog, (iii) *chimeric* if both paralogs contained unique exon(s) and/or intron(s) within their respective ORFs to the exclusion of the other paralog, and (iv) *retroposed* if the ORF of one paralog contained one or more intron(s) which were absent in the other paralog's ORF. Column 10 provides an estimate of the length of the duplicated region. Column 11 identifies particular gene duplicate pairs that were duplicated with other loci as linked sets.

| <i>Paralog A<br/>Ensemble Gene ID</i> | <i>Paralog B<br/>Ensemble Gene ID</i> | $K_S$  | $K_A$  | $K_A/K_S$ | <i>Chromosomal<br/>Location</i> | <i>Physical<br/>Distance<br/>(bp)</i> | <i>Transcriptional<br/>Orientation</i> | <i>Structural<br/>Category</i> | <i>Duplication<br/>Span (bp)</i> | <i>Linked?</i> |
|---------------------------------------|---------------------------------------|--------|--------|-----------|---------------------------------|---------------------------------------|----------------------------------------|--------------------------------|----------------------------------|----------------|
| ENSG00000232948                       | ENSG00000233050                       | 0.0000 | 0.0000 | 0.505     | 8/8                             | 147895                                | -/-                                    | Complete                       | 98670                            |                |
| ENSG00000230000                       | ENSG00000268181                       | 0.0000 | 0.0000 | 0.413     | 7/7                             | 8473                                  | +/-                                    | Complete                       | 147994                           |                |
| ENSG00000182646                       | ENSG00000179304                       | 0.0000 | 0.0000 | 0.522     | X/X                             | 9934                                  | -/+                                    | Complete                       | 44513                            |                |
| ENSG00000215033                       | ENSG00000215020                       | 0.0000 | 0.0033 | 99.000    | 10/10                           | 418855                                | +/+                                    | Complete                       | 88553                            |                |
| ENSG00000269358                       | ENSG00000269831                       | 0.0001 | 0.0121 | 99.000    | 1/1                             | 223324882                             | -/-                                    | Complete                       | 152319                           |                |
| ENSG00000197077                       | ENSG00000251180                       | 0.0007 | 0.0000 | 0.001     | 22/GL000242.1                   | NA                                    | +/+                                    | Partial                        | 43479                            |                |
| ENSG00000183474                       | ENSG00000145736                       | 0.0036 | 0.0034 | 0.935     | 5/5                             | 1362518                               | +/-                                    | Complete                       | 95695                            |                |
| ENSG00000205595                       | ENSG00000109321                       | 0.0042 | 0.0000 | 0.001     | 4/4                             | 128793                                | +/+                                    | Complete                       | 40981                            |                |
| ENSG00000168028                       | ENSG00000205246                       | 0.0049 | 0.0045 | 0.906     | 3/19                            | NA                                    | +/+                                    | Retroposed                     | 2527                             |                |
| ENSG00000204661                       | ENSG00000228259                       | 0.0060 | 0.0656 | 10.983    | 5/5                             | 7724                                  | -/+                                    | Partial                        | 6069                             |                |
| ENSG00000197620                       | ENSG00000197021                       | 0.0076 | 0.0101 | 1.334     | X/X                             | 441777                                | +/-                                    | Complete                       | 29776                            |                |
| ENSG00000182356                       | ENSG00000239511                       | 0.0096 | 0.0084 | 0.876     | 22/22                           | 2614973                               | +/-                                    | Complete                       | 38208                            |                |
| ENSG00000205076                       | ENSG00000178934                       | 0.0152 | 0.0000 | 0.001     | 19/19                           | 8415                                  | -/+                                    | Complete                       | 7597                             |                |
| ENSG00000184945                       | ENSG00000185176                       | 0.0157 | 0.0044 | 0.281     | 2/2                             | 3178                                  | +/-                                    | Complete                       | 13058                            |                |
| ENSG00000105835                       | ENSG00000229644                       | 0.0215 | 0.0029 | 0.137     | 7/10                            | NA                                    | -/-                                    | Retroposed                     | 2701                             |                |
| ENSG00000204936                       | ENSG00000204933                       | 0.0231 | 0.0110 | 0.475     | 19/19                           | 3228                                  | +/-                                    | Partial                        | 29644                            |                |
| ENSG00000186825                       | ENSG00000197927                       | 0.0291 | 0.0290 | 0.997     | 2/2                             | 19789                                 | -/+                                    | Chimeric                       | 9690                             |                |

|                 |                 |        |        |        |               |          |     |            |        |  |
|-----------------|-----------------|--------|--------|--------|---------------|----------|-----|------------|--------|--|
| ENSG00000122852 | ENSG00000185303 | 0.0294 | 0.0167 | 0.568  | 10/10         | 34380    | +/- | Complete   | 11159  |  |
| ENSG00000269337 | ENSG00000268578 | 0.0300 | 0.0000 | 0.001  | 9/9           | 25025042 | +/- | Complete   | 151099 |  |
| ENSG00000143185 | ENSG00000143184 | 0.0308 | 0.0084 | 0.274  | 1/1           | 27416    | -/+ | Complete   | 6164   |  |
| ENSG00000148672 | ENSG00000182890 | 0.0318 | 0.0220 | 0.692  | 10/X          | NA       | -/+ | Retroposed | 3180   |  |
| ENSG00000115042 | ENSG00000144199 | 0.0323 | 0.0098 | 0.303  | 2/2           | 1668109  | +/- | Complete   | 14879  |  |
| ENSG00000269099 | ENSG00000130592 | 0.0326 | 0.0102 | 0.313  | 13/11         | NA       | +/+ | Partial    | 136    |  |
| ENSG00000175548 | ENSG00000139133 | 0.0330 | 0.0250 | 0.755  | 12/12         | 4364951  | +/+ | Complete   | 152707 |  |
| ENSG00000196459 | ENSG00000256060 | 0.0451 | 0.0000 | 0.001  | X/19          | NA       | -/+ | Retroposed | 2680   |  |
| ENSG00000229924 | ENSG00000171847 | 0.0464 | 0.0335 | 0.722  | 4/12          | NA       | +/- | Complete   | 233500 |  |
| ENSG00000114547 | ENSG00000065371 | 0.0472 | 0.0228 | 0.484  | 3/3           | 1917158  | +/- | Complete   | 61111  |  |
| ENSG00000033011 | ENSG00000189366 | 0.0529 | 0.0384 | 0.725  | 16/3          | NA       | +/- | Partial    | 24702  |  |
| ENSG00000128185 | ENSG00000183628 | 0.0542 | 0.0224 | 0.414  | 22/22         | 1376928  | -/+ | Complete   | 21921  |  |
| ENSG00000169469 | ENSG00000169474 | 0.0554 | 0.0330 | 0.595  | 1/1           | 44865    | +/+ | Complete   | 2205   |  |
| ENSG00000099721 | ENSG00000125363 | 0.0564 | 0.0725 | 1.286  | Y/X           | NA       | -/+ | Complete   | 10875  |  |
| ENSG00000188672 | ENSG00000187010 | 0.0660 | 0.1021 | 1.546  | 1/1           | 33395    | -/+ | Complete   | 61003  |  |
| ENSG00000110057 | ENSG00000233094 | 0.0707 | 0.0205 | 0.289  | 11/GL000222.1 | NA       | -/+ | Partial    | 53411  |  |
| ENSG00000212643 | ENSG00000169249 | 0.0724 | 0.0294 | 0.406  | 5/X           | NA       | +/+ | Retroposed | 3083   |  |
| ENSG00000253797 | ENSG00000156697 | 0.0780 | 0.0489 | 0.627  | 13/X          | NA       | +/+ | Retroposed | 2481   |  |
| ENSG00000178700 | ENSG00000228716 | 0.0785 | 0.0452 | 0.576  | 3/5           | NA       | -/- | Retroposed | 3499   |  |
| ENSG00000229314 | ENSG00000228278 | 0.0793 | 0.0476 | 0.600  | 9/9           | 1        | +/+ | Complete   | 7053   |  |
| ENSG00000166926 | ENSG00000110077 | 0.0817 | 0.1230 | 1.505  | 11/11         | 152178   | +/- | Partial    | 7898   |  |
| ENSG00000243709 | ENSG00000143768 | 0.0851 | 0.0210 | 0.247  | 1/1           | 48103    | -/- | Complete   | 2611   |  |
| ENSG00000243317 | ENSG00000267889 | 0.0858 | 0.0199 | 0.232  | 7/2           | NA       | +/+ | Retroposed | 848    |  |
| ENSG00000196659 | ENSG00000197557 | 0.0876 | 0.0247 | 0.282  | 2/2           | 59754    | -/- | Complete   | 5829   |  |
| ENSG00000213714 | ENSG00000124103 | 0.0896 | 0.0698 | 0.778  | 20/20         | 3416     | +/+ | Complete   | 4416   |  |
| ENSG00000130741 | ENSG00000180574 | 0.0932 | 0.0445 | 0.478  | X/12          | NA       | +/+ | Retroposed | 2925   |  |
| ENSG00000172115 | ENSG00000269383 | 0.0982 | 0.1541 | 1.569  | 7/2           | NA       | -/- | Complete   | 1210   |  |
| ENSG00000224389 | ENSG00000244731 | 0.0025 | 0.0025 | 1.019  | 6/6           | 1        | +/+ | Complete   | 32741  |  |
| ENSG00000122543 | ENSG00000135175 | 0.0259 | 0.0101 | 0.390  | 7/7           | 91655248 | +/- | Complete   | 51956  |  |
| ENSG00000185897 | ENSG00000126251 | 0.0001 | 0.0076 | 99.000 | 19/19         | 9518     | +/+ | Complete   | 2936   |  |
| ENSG00000253626 | ENSG00000132507 | 0.0175 | 0.0088 | 0.505  | 10/17         | NA       | +/+ | Retroposed | 1134   |  |
| ENSG00000187630 | ENSG00000157326 | 0.0000 | 0.0000 | 0.434  | 14/14         | 1        | +/+ | Complete   | 35350  |  |
| ENSG00000269011 | ENSG00000268851 | 0.0000 | 0.0000 | 0.001  | 21/GL000215.1 | NA       | -/- | Complete   | 172472 |  |
| ENSG00000170074 | ENSG00000204677 | 0.0001 | 0.0089 | 99.000 | 5/5           | 217864   | -/+ | Complete   | 51458  |  |
| ENSG00000072444 | ENSG00000204147 | 0.0001 | 0.0057 | 99.000 | 10/10         | 4485559  | -/+ | Partial    | 43204  |  |
| ENSG00000188611 | ENSG00000204147 | 0.0000 | 0.0031 | 99.000 | 10/10         | 540267   | -/+ | Partial    | 43204  |  |
| ENSG00000143556 | ENSG00000184330 | 0.0747 | 0.0316 | 0.423  | 1/1           | 16018    | -/+ | Complete   | 24384  |  |

|                 |                 |        |        |        |               |           |     |            |        |  |
|-----------------|-----------------|--------|--------|--------|---------------|-----------|-----|------------|--------|--|
| ENSG00000122696 | ENSG00000141437 | 0.0323 | 0.0214 | 0.662  | 9/18          | NA        | -/- | Retroposed | 1272   |  |
| ENSG00000212899 | ENSG00000212900 | 0.0688 | 0.0088 | 0.127  | 17/17         | 5142      | -/- | Complete   | 605    |  |
| ENSG00000253506 | ENSG00000196531 | 0.0728 | 0.0676 | 0.929  | 17/12         | NA        | -/- | Retroposed | 836    |  |
| ENSG00000197110 | ENSG00000183709 | 0.0207 | 0.0191 | 0.922  | 19/19         | 13699     | -/+ | Complete   | 7838   |  |
| ENSG00000149531 | ENSG00000220023 | 0.0226 | 0.0477 | 2.112  | 20/GL000219.1 | NA        | +/- | Partial    | 73153  |  |
| ENSG00000188092 | ENSG00000117262 | 0.0037 | 0.0000 | 0.001  | 1/1           | 1561389   | +/- | Complete   | 85051  |  |
| ENSG00000157322 | ENSG00000157335 | 0.0104 | 0.0030 | 0.285  | 16/16         | 157874    | +/+ | Complete   | 45147  |  |
| ENSG00000157335 | ENSG00000140839 | 0.0034 | 0.0050 | 1.443  | 16/16         | 4188011   | +/- | Complete   | 39139  |  |
| ENSG00000184814 | ENSG00000233701 | 0.0951 | 0.0770 | 0.810  | 3/3           | 21031     | -/- | Complete   | 2791   |  |
| ENSG00000184814 | ENSG00000206260 | 0.0657 | 0.0492 | 0.748  | 3/3           | 12807     | -/- | Complete   | 1622   |  |
| ENSG00000204397 | ENSG00000255221 | 0.0918 | 0.0886 | 0.965  | 11/11         | 49331     | -/- | Partial    | 6535   |  |
| ENSG00000171102 | ENSG00000122136 | 0.0090 | 0.0439 | 4.851  | 9/9           | 2290487   | -/+ | Complete   | 34319  |  |
| ENSG00000184033 | ENSG00000183678 | 0.0000 | 0.0000 | 53.484 | X/X           | 21622     | -/+ | Complete   | 35968  |  |
| ENSG00000197665 | ENSG00000228157 | 0.0078 | 0.0040 | 0.511  | 17/17         | 45996     | -/+ | Complete   | 45009  |  |
| ENSG00000228157 | ENSG00000230493 | 0.0078 | 0.0040 | 0.511  | 17/17         | 72764     | +/+ | Complete   | 53320  |  |
| ENSG00000182824 | ENSG00000188280 | 0.0515 | 0.0264 | 0.513  | 22/22         | 1945636   | +/+ | Chimeric   | 26142  |  |
| ENSG00000240247 | ENSG00000239839 | 0.0000 | 0.0049 | 99.000 | 8/8           | 1         | -/- | Complete   | 19104  |  |
| ENSG00000240247 | ENSG00000206047 | 0.0000 | 0.0000 | 0.001  | 8/8           | 1         | -/- | Complete   | 19104  |  |
| ENSG00000177710 | ENSG00000164729 | 0.0237 | 0.0401 | 1.687  | 8/17          | NA        | +/- | Complete   | 3057   |  |
| ENSG00000164729 | ENSG00000259224 | 0.0242 | 0.0412 | 1.701  | 17/17         | 26133000  | -/+ | Retroposed | 1696   |  |
| ENSG00000254598 | ENSG00000101266 | 0.0970 | 0.0548 | 0.565  | 11/20         | NA        | -/- | Retroposed | 1534   |  |
| ENSG00000166157 | ENSG00000132958 | 0.0752 | 0.0881 | 1.173  | 21/13         | NA        | -/- | Complete   | 94110  |  |
| ENSG00000170215 | ENSG00000154537 | 0.0209 | 0.0000 | 0.001  | 9/9           | 22291902  | -/+ | Complete   | 284036 |  |
| ENSG00000268942 | ENSG00000173207 | 0.0503 | 0.0497 | 0.989  | 5/1           | NA        | -/+ | Retroposed | 1746   |  |
| ENSG00000173432 | ENSG00000134339 | 0.0591 | 0.0766 | 1.296  | 11/11         | 15647     | +/- | Partial    | 4464   |  |
| ENSG00000196312 | ENSG00000148110 | 0.0834 | 0.0732 | 0.879  | 9/9           | 2510563   | -/+ | Chimeric   | 78167  |  |
| ENSG00000099984 | ENSG00000133433 | 0.0115 | 0.0018 | 0.161  | 22/22         | 2128      | +/- | Complete   | 30285  |  |
| ENSG00000186523 | ENSG00000118894 | 0.0880 | 0.0388 | 0.441  | 8/16          | NA        | -/- | Complete   | 49398  |  |
| ENSG00000237847 | ENSG00000268991 | 0.0000 | 0.0000 | 0.432  | 1/1           | 44330     | +/- | Complete   | 35034  |  |
| ENSG00000203815 | ENSG00000268991 | 0.0526 | 0.0549 | 1.043  | 1/1           | 132612981 | +/- | Complete   | 1684   |  |
| ENSG00000203815 | ENSG00000268674 | 0.0635 | 0.0911 | 1.435  | 1/1           | 132808823 | +/+ | Complete   | 1686   |  |
| ENSG00000099290 | ENSG00000172661 | 0.0114 | 0.0062 | 0.548  | 10/10         | 5503229   | +/+ | Complete   | 101659 |  |
| ENSG00000226784 | ENSG00000171314 | 0.0093 | 0.0211 | 2.266  | X/10          | NA        | -/+ | Retroposed | 1689   |  |
| ENSG00000212724 | ENSG00000213417 | 0.0376 | 0.0000 | 0.001  | 17/17         | 5218      | -/- | Complete   | 576    |  |
| ENSG00000214518 | ENSG00000212725 | 0.0000 | 0.0000 | 0.303  | 17/17         | 7362      | -/- | Complete   | 582    |  |
| ENSG00000212725 | ENSG00000213417 | 0.0000 | 0.0029 | 99.000 | 17/17         | 17932     | -/- | Complete   | 661    |  |
| ENSG00000174428 | ENSG00000196275 | 0.0011 | 0.0037 | 3.427  | 7/7           | 203874    | +/- | Complete   | 143572 |  |

|                 |                 |        |        |        |               |          |     |            |        |  |
|-----------------|-----------------|--------|--------|--------|---------------|----------|-----|------------|--------|--|
| ENSG00000163283 | ENSG00000163286 | 0.0632 | 0.0140 | 0.221  | 2/2           | 18456    | +/+ | Complete   | 8712   |  |
| ENSG00000238083 | ENSG00000176681 | 0.0040 | 0.0053 | 1.337  | 17/17         | 19900    | +/+ | Complete   | 197813 |  |
| ENSG00000176681 | ENSG00000176809 | 0.0478 | 0.0285 | 0.595  | 17/17         | 18413859 | +/- | Complete   | 66453  |  |
| ENSG00000139223 | ENSG00000140350 | 0.0783 | 0.0629 | 0.804  | 12/15         | NA       | +/- | Retroposed | 646    |  |
| ENSG00000169763 | ENSG00000169807 | 0.0000 | 0.0000 | 0.461  | Y/Y           | 1441567  | -/- | Complete   | 168120 |  |
| ENSG00000269526 | ENSG00000268964 | 0.0345 | 0.0239 | 0.692  | 19/19         | 1        | +/+ | Complete   | 32741  |  |
| ENSG00000143954 | ENSG00000172016 | 0.0973 | 0.0736 | 0.757  | 2/2           | 127878   | +/- | Complete   | 3641   |  |
| ENSG00000205456 | ENSG00000205457 | 0.0071 | 0.0000 | 0.001  | 16/16         | 634356   | +/+ | Complete   | 306492 |  |
| ENSG00000205456 | ENSG00000261509 | 0.0071 | 0.0000 | 0.001  | 16/16         | 865729   | +/+ | Complete   | 130935 |  |
| ENSG00000205457 | ENSG00000183632 | 0.0000 | 0.0000 | 0.384  | 16/16         | 214228   | +/- | Complete   | 183089 |  |
| ENSG00000203817 | ENSG00000215784 | 0.0001 | 0.0057 | 99.000 | 1/1           | 5411200  | -/- | Partial    | 35229  |  |
| ENSG00000188610 | ENSG00000215784 | 0.0065 | 0.0142 | 2.168  | 1/1           | 23007885 | +/- | Complete   | 124962 |  |
| ENSG00000111775 | ENSG00000226976 | 0.0219 | 0.0087 | 0.396  | 12/6          | NA       | +/+ | Retroposed | 553    |  |
| ENSG00000227151 | ENSG00000229665 | 0.0000 | 0.0000 | 0.399  | 13/13         | 1        | +/+ | Complete   | 27725  |  |
| ENSG00000227151 | ENSG00000234278 | 0.0000 | 0.0000 | 0.001  | 13/13         | 1        | +/+ | Complete   | 27725  |  |
| ENSG00000204918 | ENSG00000229665 | 0.0000 | 0.0000 | 0.001  | 13/13         | 1        | +/+ | Complete   | 27725  |  |
| ENSG00000204918 | ENSG00000204919 | 0.0000 | 0.0000 | 0.440  | 13/13         | 1        | +/+ | Complete   | 27725  |  |
| ENSG00000174876 | ENSG00000187733 | 0.0000 | 0.0000 | 0.470  | 1/1           | 19160    | -/+ | Complete   | 34804  |  |
| ENSG00000174876 | ENSG00000240038 | 0.0724 | 0.0128 | 0.177  | 1/1           | 107727   | -/+ | Complete   | 8790   |  |
| ENSG00000237763 | ENSG00000187733 | 0.0000 | 0.0000 | 0.059  | 1/1           | 45596    | +/+ | Complete   | 48555  |  |
| ENSG00000243480 | ENSG00000240038 | 0.0550 | 0.0063 | 0.114  | 1/1           | 37007    | +/+ | Complete   | 8829   |  |
| ENSG00000196507 | ENSG00000204071 | 0.0708 | 0.0383 | 0.541  | X/X           | 1464257  | +/- | Complete   | 3441   |  |
| ENSG00000183461 | ENSG00000204375 | 0.0000 | 0.0000 | 0.001  | X/X           | 21643    | +/- | Complete   | 28680  |  |
| ENSG00000244067 | ENSG00000182793 | 0.0993 | 0.0667 | 0.672  | 6/6           | 63506    | -/- | Complete   | 17783  |  |
| ENSG00000244067 | ENSG00000243955 | 0.0582 | 0.0257 | 0.442  | 6/6           | 19782    | -/- | Complete   | 20881  |  |
| ENSG00000228532 | ENSG00000188612 | 0.0198 | 0.0057 | 0.290  | X/17          | NA       | -/- | Retroposed | 2379   |  |
| ENSG00000177688 | ENSG00000188612 | 0.0699 | 0.0785 | 1.122  | 6/17          | NA       | +/- | Retroposed | 1083   |  |
| ENSG00000220903 | ENSG00000225899 | 0.0379 | 0.0267 | 0.703  | GL000222.1/10 | NA       | -/- | Complete   | 6409   |  |
| ENSG00000220903 | ENSG00000172969 | 0.0000 | 0.0000 | 0.477  | GL000222.1/3  | NA       | -/+ | Complete   | 186774 |  |
| ENSG00000205097 | ENSG00000148828 | 0.0000 | 0.0000 | 0.425  | 4/GL000228.1  | NA       | -/- | Complete   | 98341  |  |
| ENSG00000225899 | ENSG00000148828 | 0.0037 | 0.0072 | 1.922  | 10/GL000228.1 | NA       | -/- | Complete   | 74632  |  |
| ENSG00000169953 | ENSG00000172468 | 0.0000 | 0.0000 | 0.001  | Y/Y           | 39643    | -/+ | Complete   | 190162 |  |
| ENSG00000185554 | ENSG00000185945 | 0.0016 | 0.0000 | 0.001  | X/X           | 10765    | +/- | Complete   | 140562 |  |
| ENSG00000237289 | ENSG00000223572 | 0.0046 | 0.0000 | 0.001  | 15/15         | 1        | +/+ | Complete   | 92931  |  |
| ENSG00000105889 | ENSG00000164647 | 0.0062 | 0.0258 | 4.160  | 7/7           | 67145303 | -/+ | Chimeric   | 48968  |  |
| ENSG00000196934 | ENSG00000183246 | 0.0000 | 0.0005 | 99.000 | 22/22         | 48673    | +/- | Complete   | 70268  |  |
| ENSG00000196622 | ENSG00000183246 | 0.0008 | 0.0033 | 3.924  | 22/22         | 1344155  | -/- | Complete   | 99520  |  |

|                 |                 |        |        |        |       |         |     |          |              |              |
|-----------------|-----------------|--------|--------|--------|-------|---------|-----|----------|--------------|--------------|
| ENSG00000205810 | ENSG00000205809 | 0.0813 | 0.1096 | 1.348  | 12/12 | 4501    | -/- | Partial  | 10755        |              |
| ENSG00000206181 | ENSG00000266996 | 0.0889 | 0.0865 | 0.973  | 18/18 | 12842   | -/- | Complete | 3813         |              |
| ENSG00000266996 | ENSG00000234298 | 0.0000 | 0.0017 | 99.000 | 18/18 | 931     | -/- | Complete | 4992         |              |
| ENSG00000234298 | ENSG00000183791 | 0.0000 | 0.0018 | 99.000 | 18/18 | 923     | -/- | Complete | 4963         |              |
| ENSG00000223524 | ENSG00000255940 | 0.0000 | 0.0000 | 0.001  | 8/8   | 2970    | +/- | Complete | 14283        |              |
| ENSG00000223524 | ENSG00000205176 | 0.0072 | 0.0006 | 0.088  | 8/8   | 170367  | +/- | Complete | 3993         |              |
| ENSG00000119673 | ENSG00000184227 | 0.0814 | 0.0374 | 0.459  | 14/14 | 1452    | +/+ | Complete | 26573        |              |
| ENSG00000158427 | ENSG00000158164 | 0.0377 | 0.0000 | 0.001  | X/X   | 1426646 | +/- | Complete | 10733        |              |
| ENSG00000147059 | ENSG00000186787 | 0.0038 | 0.0020 | 0.533  | X/X   | 10452   | -/- | Complete | 5259         |              |
| ENSG00000136488 | ENSG00000213218 | 0.0571 | 0.0035 | 0.061  | 17/17 | 7468    | -/- | Complete | 15106        |              |
| ENSG00000136488 | ENSG00000259384 | 0.0953 | 0.0604 | 0.633  | 17/17 | 16832   | -/- | Complete | 4504         |              |
| ENSG00000204807 | ENSG00000204804 | 0.0646 | 0.1193 | 1.848  | 9/9   | 1554    | +/- | Complete | 2935         |              |
| ENSG00000215356 | ENSG00000215372 | 0.0206 | 0.0382 | 1.858  | 8/8   | 63872   | +/- | Complete | 458748       | Linked Set 1 |
| ENSG00000171711 | ENSG00000177257 | 0.0159 | 0.0000 | 0.001  | 8/8   | 63872   | +/- | Complete | Linked Set 1 |              |
| ENSG00000176797 | ENSG00000177243 | 0.0000 | 0.0000 | 0.388  | 8/8   | 63872   | +/- | Complete | Linked Set 1 |              |
| ENSG00000178287 | ENSG00000164871 | 0.0000 | 0.0000 | 0.467  | 8/8   | 63872   | +/- | Complete | Linked Set 1 |              |
| ENSG00000176782 | ENSG00000177023 | 0.0000 | 0.0000 | 0.325  | 8/8   | 63872   | +/- | Complete | Linked Set 1 |              |
| ENSG00000186579 | ENSG00000187082 | 0.0000 | 0.0000 | 0.516  | 8/8   | 63872   | +/- | Complete | Linked Set 1 |              |
| ENSG00000186562 | ENSG00000186599 | 0.0000 | 0.0000 | 0.001  | 8/8   | 63872   | -/+ | Complete | Linked Set 1 |              |
| ENSG00000186572 | ENSG00000198129 | 0.0000 | 0.0000 | 0.001  | 8/8   | 63872   | -/+ | Complete | Linked Set 1 |              |
| ENSG00000255378 | ENSG00000255251 | 0.0000 | 0.0000 | 0.491  | 8/8   | 63872   | -/+ | Complete | Linked Set 1 |              |
| ENSG00000103226 | ENSG00000103512 | 0.0093 | 0.0024 | 0.256  | 16/16 | 1257670 | +/+ | Complete | 141089       | Linked Set 2 |
| ENSG00000183889 | ENSG00000183426 | 0.0095 | 0.0042 | 0.462  | 16/16 | 1257670 | +/+ | Complete | Linked Set 2 |              |
| ENSG00000146574 | ENSG00000122674 | 0.0038 | 0.0000 | 0.001  | 7/7   | 739684  | -/+ | Complete | 99359        | Linked Set 3 |
| ENSG00000169402 | ENSG00000155026 | 0.0017 | 0.0015 | 0.894  | 7/7   | 739684  | +/- | Complete | Linked Set 3 |              |
| ENSG00000187243 | ENSG00000154545 | 0.0000 | 0.0000 | 0.425  | X/X   | 99855   | -/+ | Complete | 36405        | Linked Set 4 |
| ENSG00000182776 | ENSG00000179028 | 0.0000 | 0.0000 | 0.001  | X/X   | 99855   | -/+ | Complete | Linked Set 4 |              |
| ENSG00000182230 | ENSG00000170074 | 0.0028 | 0.0105 | 3.693  | 5/5   | 1318801 | +/- | Complete | 315967       | Linked Set 5 |
| ENSG00000248469 | ENSG00000249109 | 0.0000 | 0.0000 | 0.458  | 5/5   | 1318801 | -/+ | Complete | Linked Set 5 |              |
| ENSG00000214967 | ENSG00000214940 | 0.0000 | 0.0000 | 99.000 | 16/16 | 1569911 | +/- | Complete | 372537       | Linked Set 6 |
| ENSG00000183889 | ENSG00000233024 | 0.0000 | 0.0000 | 0.474  | 16/16 | 1569911 | +/- | Complete | Linked Set 6 |              |
| ENSG00000103226 | ENSG00000185164 | 0.0067 | 0.0011 | 0.166  | 16/16 | 1569911 | +/- | Complete | Linked Set 6 |              |
| ENSG00000174196 | ENSG00000172661 | 0.0000 | 0.0000 | 0.001  | 10/10 | 4760447 | +/+ | Partial  | 143021       | Linked Set 7 |
| ENSG00000174194 | ENSG00000188234 | 0.0055 | 0.0039 | 0.708  | 10/10 | 4760447 | -/- | Complete | Linked Set 7 |              |
| ENSG00000233232 | ENSG00000255524 | 0.0106 | 0.0318 | 0.816  | 16/16 | 169291  | -/+ | Partial  | 134554       | Linked Set 8 |
| ENSG00000205609 | ENSG00000184110 | 0.0000 | 0.0000 | 0.486  | 16/16 | 169291  | -/+ | Complete | Linked Set 8 |              |
| ENSG00000198156 | ENSG00000196993 | 0.0136 | 0.1021 | 0.878  | 16/16 | 169291  | -/+ | Complete | Linked Set 8 |              |

|                 |                 |        |        |        |               |          |     |          |               |               |
|-----------------|-----------------|--------|--------|--------|---------------|----------|-----|----------|---------------|---------------|
| ENSG00000197859 | ENSG00000215616 | 0.0000 | 0.0000 | 0.466  | 9/GL000201.1  | NA       | +/+ | Partial  | 36106         | Linked Set 9  |
| ENSG00000196990 | ENSG00000215611 | 0.0181 | 0.0046 | 0.255  | 9/GL000201.1  | NA       | -/- | Complete | Linked Set 9  |               |
| ENSG00000172058 | ENSG00000205572 | 0.0000 | 0.0000 | 0.479  | 5/5           | 381073   | +/+ | Complete | 494845        | Linked Set 10 |
| ENSG00000172062 | ENSG00000205571 | 0.0000 | 0.0145 | 6.722  | 5/5           | 381073   | +/+ | Complete | Linked Set 10 |               |
| ENSG00000184040 | ENSG00000148483 | 0.0000 | 0.0000 | 0.393  | 10/10         | 50001    | +/+ | Complete | 196904        | Linked Set 11 |
| ENSG00000120586 | ENSG00000183748 | 0.0050 | 0.0009 | 0.182  | 10/10         | 50001    | +/+ | Complete | Linked Set 11 |               |
| ENSG00000204807 | ENSG00000232833 | 0.0003 | 0.0453 | 3.805  | 9/9           | 21954191 | +/- | Complete | 145047        | Linked Set 12 |
| ENSG00000182368 | ENSG00000170215 | 0.0000 | 0.0000 | 0.393  | 9/9           | 21954191 | +/- | Complete | Linked Set 12 |               |
| ENSG00000198444 | ENSG00000185990 | 0.0000 | 0.0000 | 0.447  | X/X           | 66875    | +/- | Complete | 50563         | Linked Set 13 |
| ENSG00000198307 | ENSG00000185978 | 0.0000 | 0.0000 | 1.355  | X/X           | 66875    | +/- | Complete | Linked Set 13 |               |
| ENSG00000267985 | ENSG00000268891 | 0.0000 | 0.0000 | 0.468  | 7/7           | 2408306  | +/- | Complete | 199323        | Linked Set 14 |
| ENSG00000155428 | ENSG00000178809 | 0.0259 | 0.0016 | 0.063  | 7/7           | 2408306  | -/+ | Complete | Linked Set 14 |               |
| ENSG00000196313 | ENSG00000135213 | 0.0192 | 0.0291 | 0.730  | 7/7           | 2408306  | +/- | Complete | Linked Set 14 |               |
| ENSG00000169627 | ENSG00000183336 | 0.0000 | 0.0000 | 0.001  | 16/16         | 592983   | -/- | Complete | 146356        | Linked Set 15 |
| ENSG00000132207 | ENSG00000181625 | 0.0000 | 0.0000 | 0.001  | 16/16         | 592983   | +/+ | Complete | Linked Set 15 |               |
| ENSG00000261052 | ENSG00000213648 | 0.0000 | 0.0000 | 0.499  | 16/16         | 592983   | +/+ | Complete | Linked Set 15 |               |
| ENSG00000198064 | ENSG00000169203 | 0.0015 | 0.0000 | 0.001  | 16/16         | 592983   | -/- | Complete | Linked Set 15 |               |
| ENSG00000258150 | ENSG00000258130 | 0.0000 | 0.0011 | 99.000 | 16/16         | 592983   | -/- | Complete | Linked Set 15 |               |
| ENSG00000189266 | ENSG00000215700 | 0.0000 | 0.0000 | 0.391  | 1/GL000191.1  | NA       | +/+ | Complete | 106432        | Linked Set 16 |
| ENSG00000188529 | ENSG00000215699 | 0.0000 | 0.0030 | 99.000 | 1/GL000191.1  | NA       | -/- | Complete | Linked Set 16 |               |
| ENSG00000204149 | ENSG00000174194 | 0.0146 | 0.0066 | 0.456  | 10/10         | 197048   | +/- | Complete | 181193        | Linked Set 17 |
| ENSG00000138297 | ENSG00000204152 | 0.0001 | 0.0281 | 3.134  | 10/10         | 197048   | -/+ | Partial  | Linked Set 17 |               |
| ENSG00000235173 | ENSG00000230567 | 0.0000 | 0.0011 | 99.000 | 8/8           | 100001   | +/+ | Complete | 69111         | Linked Set 18 |
| ENSG00000204775 | ENSG00000170727 | 0.0000 | 0.0000 | 0.403  | 8/8           | 100001   | -/- | Partial  | Linked Set 18 |               |
| ENSG00000268531 | ENSG00000268343 | 0.0000 | 0.0046 | 99.000 | 15/15         | 685431   | +/+ | Complete | 321118        | Linked Set 19 |
| ENSG00000233917 | ENSG00000230031 | 0.0000 | 0.0000 | 0.440  | 15/15         | 685431   | -/- | Complete | Linked Set 19 |               |
| ENSG00000152086 | ENSG00000075886 | 0.0317 | 0.0060 | 0.189  | 2/2           | 1080189  | -/+ | Complete | 221851        | Linked Set 20 |
| ENSG00000152076 | ENSG00000163040 | 0.0175 | 0.0085 | 0.484  | 2/2           | 1080189  | -/+ | Complete | Linked Set 20 |               |
| ENSG00000168255 | ENSG00000228049 | 0.0747 | 0.4109 | 0.364  | 7/7           | 1        | -/- | Complete | 121324        | Linked Set 21 |
| ENSG00000005075 | ENSG00000168255 | 0.0366 | 0.3899 | 0.410  | 7/7           | 1        | -/- | Chimeric | Linked Set 21 |               |
| ENSG00000205233 | ENSG00000189093 | 0.0000 | 0.0000 | 0.001  | 7/7           | 1        | -/- | Complete | Linked Set 21 |               |
| ENSG00000170667 | ENSG00000105808 | 0.0054 | 0.0011 | 0.205  | 7/7           | 1        | -/- | Complete | Linked Set 21 |               |
| ENSG00000205238 | ENSG00000173678 | 0.0000 | 0.0011 | 99.000 | 7/7           | 1        | +/+ | Complete | Linked Set 21 |               |
| ENSG00000237375 | ENSG00000166351 | 0.0016 | 0.0027 | 1.628  | GL000213.1/21 | NA       | -/+ | Complete | 164238        | Linked Set 22 |
| ENSG00000269725 | ENSG00000269011 | 0.0000 | 0.0000 | 0.001  | GL000213.1/21 | NA       | +/- | Complete | Linked Set 22 |               |
| ENSG00000152726 | ENSG00000099290 | 0.0031 | 0.0015 | 0.472  | 10/10         | 3855364  | +/+ | Partial  | 89925         | Linked Set 23 |
| ENSG00000072444 | ENSG00000188611 | 0.0044 | 0.0096 | 0.611  | 10/10         | 3855364  | -/- | Partial  | Linked Set 23 |               |

|                 |                 |        |        |        |       |          |     |          |               |               |
|-----------------|-----------------|--------|--------|--------|-------|----------|-----|----------|---------------|---------------|
| ENSG00000222038 | ENSG00000196834 | 0.0040 | 0.0029 | 0.720  | 2/2   | 1        | +/- | Complete | 159213        | Linked Set 24 |
| ENSG00000183292 | ENSG00000184761 | 0.0266 | 0.2235 | 0.526  | 2/2   | 1        | +/- | Complete | Linked Set 24 |               |
| ENSG00000188120 | ENSG00000205916 | 0.0000 | 0.0025 | 99.000 | Y/Y   | 1621997  | -/+ | Complete | 421202        | Linked Set 25 |
| ENSG00000183753 | ENSG00000185894 | 0.0000 | 0.0000 | 0.393  | Y/Y   | 1621997  | +/- | Complete | Linked Set 25 |               |
| ENSG00000183753 | ENSG00000183795 | 0.0000 | 0.0000 | 99.000 | Y/Y   | 1238175  | +/+ | Complete | 395549        | Linked Set 26 |
| ENSG00000188120 | ENSG00000187191 | 0.0117 | 0.0091 | 0.727  | Y/Y   | 1238175  | -/- | Complete | Linked Set 26 |               |
| ENSG00000185894 | ENSG00000183795 | 0.0000 | 0.0000 | 0.422  | Y/Y   | 2139     | -/+ | Complete | 408818        | Linked Set 27 |
| ENSG00000205916 | ENSG00000187191 | 0.0078 | 0.0056 | 0.711  | Y/Y   | 2139     | +/- | Complete | Linked Set 27 |               |
| ENSG00000196644 | ENSG00000188092 | 0.0000 | 0.0026 | 99.000 | 1/1   | 1260168  | +/+ | Partial  | 281531        | Linked Set 28 |
| ENSG00000152042 | ENSG00000203836 | 0.0081 | 0.0102 | 0.421  | 1/1   | 1260168  | -/- | Complete | Linked Set 28 |               |
| ENSG00000172014 | ENSG00000132498 | 0.0033 | 0.0054 | 1.660  | 9/9   | 26193469 | +/- | Complete | 440115        | Linked Set 29 |
| ENSG00000204788 | ENSG00000232866 | 0.0073 | 0.0037 | 0.503  | 9/9   | 26193469 | -/+ | Complete | Linked Set 29 |               |
| ENSG00000204788 | ENSG00000233434 | 0.0000 | 0.0029 | 99.000 | 9/9   | 1340388  | -/- | Complete | 114813        | Linked Set 30 |
| ENSG00000172014 | ENSG00000196774 | 0.0017 | 0.0048 | 2.754  | 9/9   | 1340388  | +/+ | Complete | Linked Set 30 |               |
| ENSG00000232866 | ENSG00000233434 | 0.0091 | 0.0066 | 0.729  | 9/9   | 24738227 | +/- | Complete | 88713         | Linked Set 31 |
| ENSG00000132498 | ENSG00000196774 | 0.0015 | 0.0028 | 1.848  | 9/9   | 24738227 | -/+ | Complete | Linked Set 31 |               |
| ENSG00000198307 | ENSG00000198082 | 0.0000 | 0.0037 | 99.000 | X/X   | 487550   | +/+ | Complete | 9515          | Linked Set 32 |
| ENSG00000198444 | ENSG00000197932 | 0.0000 | 0.0000 | 0.403  | X/X   | 487550   | +/+ | Complete | Linked Set 32 |               |
| ENSG00000185978 | ENSG00000198082 | 0.0000 | 0.0037 | 99.000 | X/X   | 565704   | -/+ | Complete | 9515          | Linked Set 33 |
| ENSG00000185990 | ENSG00000197932 | 0.0000 | 0.0000 | 0.405  | X/X   | 565704   | -/+ | Complete | Linked Set 33 |               |
| ENSG00000172283 | ENSG00000169763 | 0.0000 | 0.0000 | 0.001  | Y/Y   | 842578   | +/- | Complete | 1054777       | Linked Set 34 |
| ENSG00000269393 | ENSG00000267935 | 0.0000 | 0.0000 | 0.001  | Y/Y   | 842578   | -/+ | Complete | Linked Set 34 |               |
| ENSG00000172288 | ENSG00000172352 | 0.0000 | 0.0000 | 0.001  | Y/Y   | 842578   | +/- | Complete | Linked Set 34 |               |
| ENSG00000169789 | ENSG00000169807 | 0.0000 | 0.0000 | 0.379  | Y/Y   | 168948   | +/- | Complete | 283838        | Linked Set 35 |
| ENSG00000226941 | ENSG00000169800 | 0.0031 | 0.0000 | 0.001  | Y/Y   | 168948   | +/- | Complete | Linked Set 35 |               |
| ENSG00000171928 | ENSG00000175106 | 0.0320 | 0.0400 | 0.692  | 17/17 | 2872263  | +/- | Partial  | 195489        | Linked Set 36 |
| ENSG00000171931 | ENSG00000251537 | 0.0674 | 0.1966 | 0.552  | 17/17 | 2872263  | +/- | Complete | Linked Set 36 |               |
| ENSG00000108448 | ENSG00000251537 | 0.0528 | 0.2444 | 0.431  | 17/17 | 2872263  | +/- | Complete | Linked Set 36 |               |
| ENSG00000249459 | ENSG00000187607 | 0.0184 | 0.1020 | 0.636  | 17/17 | 2872263  | -/+ | Complete | Linked Set 36 |               |
| ENSG00000189375 | ENSG00000214946 | 0.0553 | 0.0778 | 0.361  | 17/17 | 2872263  | -/+ | Complete | Linked Set 36 |               |
| ENSG00000187559 | ENSG00000204793 | 0.0000 | 0.0022 | 99.000 | 9/9   | 1562677  | +/- | Complete | 189814        | Linked Set 37 |
| ENSG00000196873 | ENSG00000204790 | 0.0068 | 0.0034 | 0.504  | 9/9   | 1562677  | +/- | Complete | Linked Set 37 |               |
| ENSG00000228537 | ENSG00000196400 | 0.0148 | 0.0000 | 0.001  | 9/9   | 1562677  | -/+ | Complete | Linked Set 37 |               |
| ENSG00000196873 | ENSG00000136682 | 0.0164 | 0.0105 | 0.641  | 9/2   | NA       | +/+ | Complete | 149372        | Linked Set 38 |
| ENSG00000228537 | ENSG00000238091 | 0.0000 | 0.0000 | 0.303  | 9/2   | NA       | -/- | Complete | Linked Set 38 |               |
| ENSG00000187559 | ENSG00000184492 | 0.0216 | 0.1924 | 0.529  | 9/2   | NA       | +/+ | Complete | Linked Set 38 |               |
| ENSG00000171129 | ENSG00000171116 | 0.0000 | 0.0000 | 0.398  | X/X   | 164854   | -/+ | Complete | 29139         | Linked Set 39 |

|                 |                 |        |        |        |               |        |     |          |               |               |
|-----------------|-----------------|--------|--------|--------|---------------|--------|-----|----------|---------------|---------------|
| ENSG00000123584 | ENSG00000166008 | 0.0000 | 0.0000 | 0.411  | X/X           | 164854 | -/+ | Complete | Linked Set 39 |               |
| ENSG00000231997 | ENSG00000204804 | 0.0984 | 0.1482 | 0.780  | 9/9           | 486881 | +/- | Complete | 152361        | Linked Set 40 |
| ENSG00000237198 | ENSG00000204807 | 0.0001 | 0.0115 | 99.000 | 9/9           | 486881 | -/+ | Complete | Linked Set 40 |               |
| ENSG00000234295 | ENSG00000157423 | 0.0051 | 0.0021 | 0.416  | GL000192.1/16 | NA     | -/- | Partial  | 357293        | Linked Set 41 |
| ENSG00000215642 | ENSG00000157423 | 0.0050 | 0.0049 | 0.970  | GL000192.1/16 | NA     | -/- | Partial  | Linked Set 41 |               |
| ENSG00000204382 | ENSG00000204379 | 0.0000 | 0.0000 | 0.414  | X/X           | 8341   | +/- | Complete | 142156        | Linked Set 42 |
| ENSG00000155622 | ENSG00000185751 | 0.0000 | 0.0000 | 0.536  | X/X           | 8341   | +/- | Complete | Linked Set 42 |               |
| ENSG00000183461 | ENSG00000204382 | 0.0000 | 0.0000 | 0.504  | X/X           | 179068 | +/+ | Complete | 93872         | Linked Set 43 |
| ENSG00000204376 | ENSG00000204379 | 0.0000 | 0.0000 | 0.470  | X/X           | 179068 | -/- | Complete | Linked Set 43 |               |
